# Supplementary material
Source: HighWire-hosted journal article supplement (https://www.g3journal.org/content/suppl/2014/08/04/g3.114.011262)

Figure displaying BiGPS normalized tissue expression for the gene TSPAN10, highly biased in *M. lucifugus*.

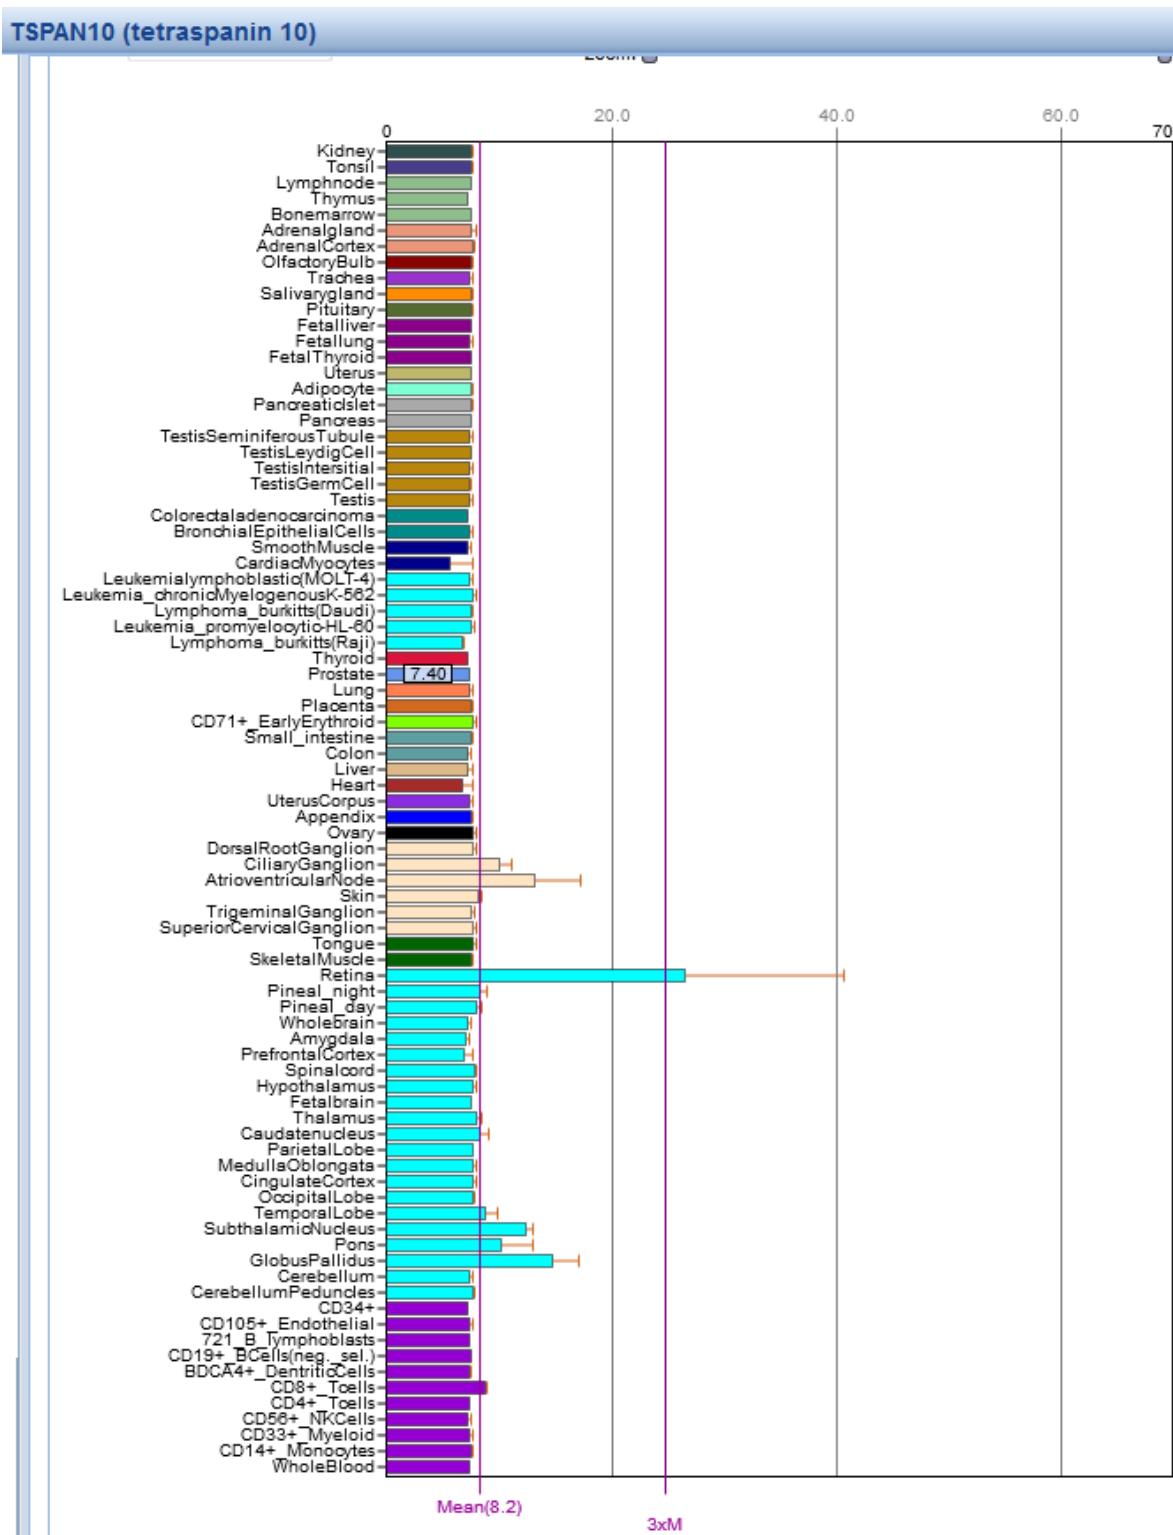

Supplement: FileS3.pdf [file FileS3.pdf]
